# Supplementary material for: Composited Co3O4/Ag with flower-like nanosheets anchored on a porous substrate as a high-performance anode for Li-ion batteries
Source: Royal Society of Chemistry journal article supplement (doi:10.1039/c5ta03658e), 2015-01-01
Supplement: c5ta03658e1.pdf [file c5ta03658e1.pdf]

Supplementary Information for:

**Composited  $\text{Co}_3\text{O}_4/\text{Ag}$  with Flower-Like Nanosheets Anchored on Porous Substrate as a High-  
Performance Anode for Li-Ion Batteries**

*Qin Hao,<sup>a</sup> Yang Yu,<sup>b</sup> Dianyun Zhao,<sup>a</sup> Caixia Xu<sup>a\*</sup>*

*<sup>a</sup>School of Chemistry and Chemical Engineering, University of Jinan, Jinan, 250022, China.*

*<sup>b</sup>Shandong Product Quality Inspection Research Institute, Jinan, 250102, China.*

*\*[chm\\_xucx@ujn.edu.cn](mailto:chm_xucx@ujn.edu.cn)*

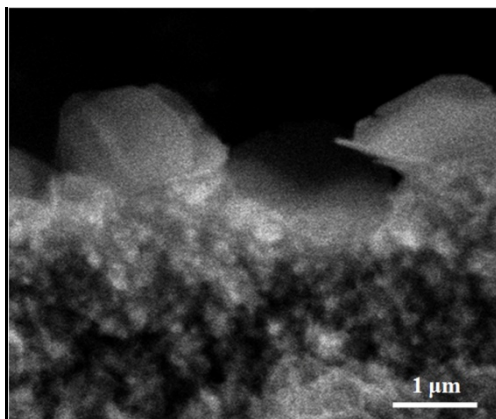

**Fig. S1.** The cross-sectional SEM of Co<sub>3</sub>O<sub>4</sub>/Ag sample dealloyed from Co<sub>12</sub>Ag<sub>3</sub>Al<sub>85</sub> alloy in 1 M NaOH solution for 10 h.

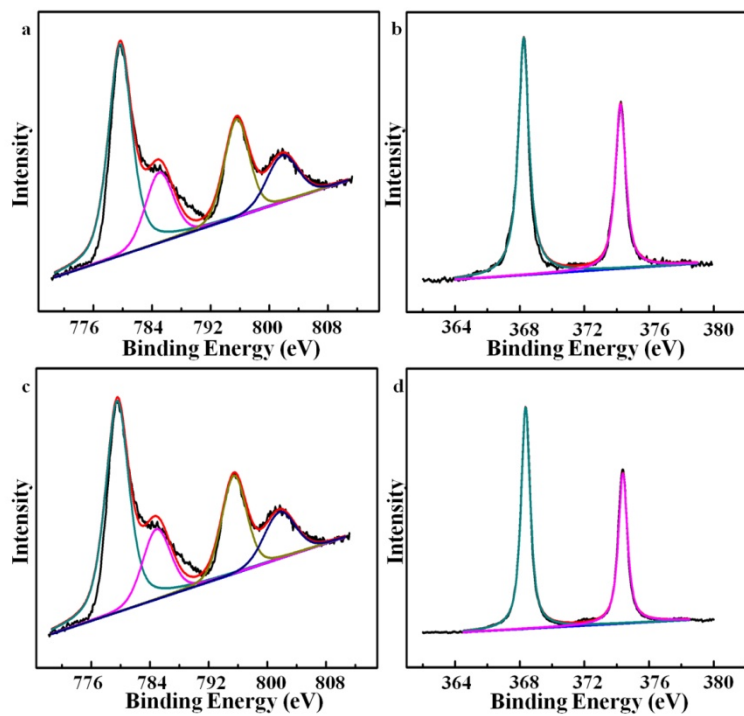

**Fig. S2.** XPS of (a&c) Co 2p and (b&d) Ag 3d for the fresh  $\text{Co}_3\text{O}_4/\text{Ag}$  samples dealloyed from (a&b)  $\text{Co}_{13}\text{Ag}_2\text{Al}_{85}$  and (c&d)  $\text{Co}_{14}\text{Ag}_1\text{Al}_{85}$  alloys.

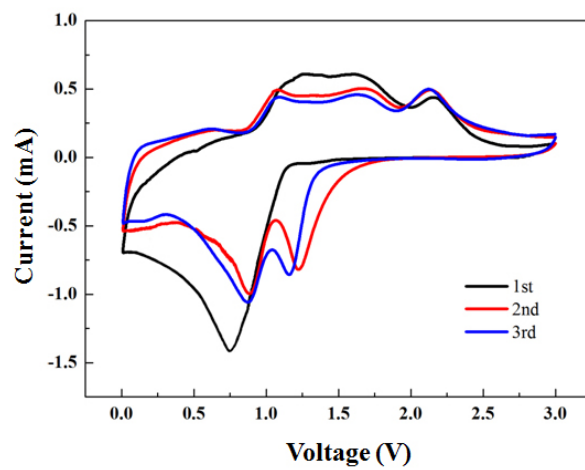

Fig. S3. Cyclic voltammetric (CV) curves of the  $\text{Co}_3\text{O}_4/\text{Ag}$  electrode dealloyed from  $\text{Co}_{12}\text{Ag}_3\text{Al}_{85}$  alloy.
